# Supplementary material
Source: publisher site journal article supplement (https://www.dovepress.com/article/384054)
Supplement: Supplementary file 1 [file get_supplementary_file.php]

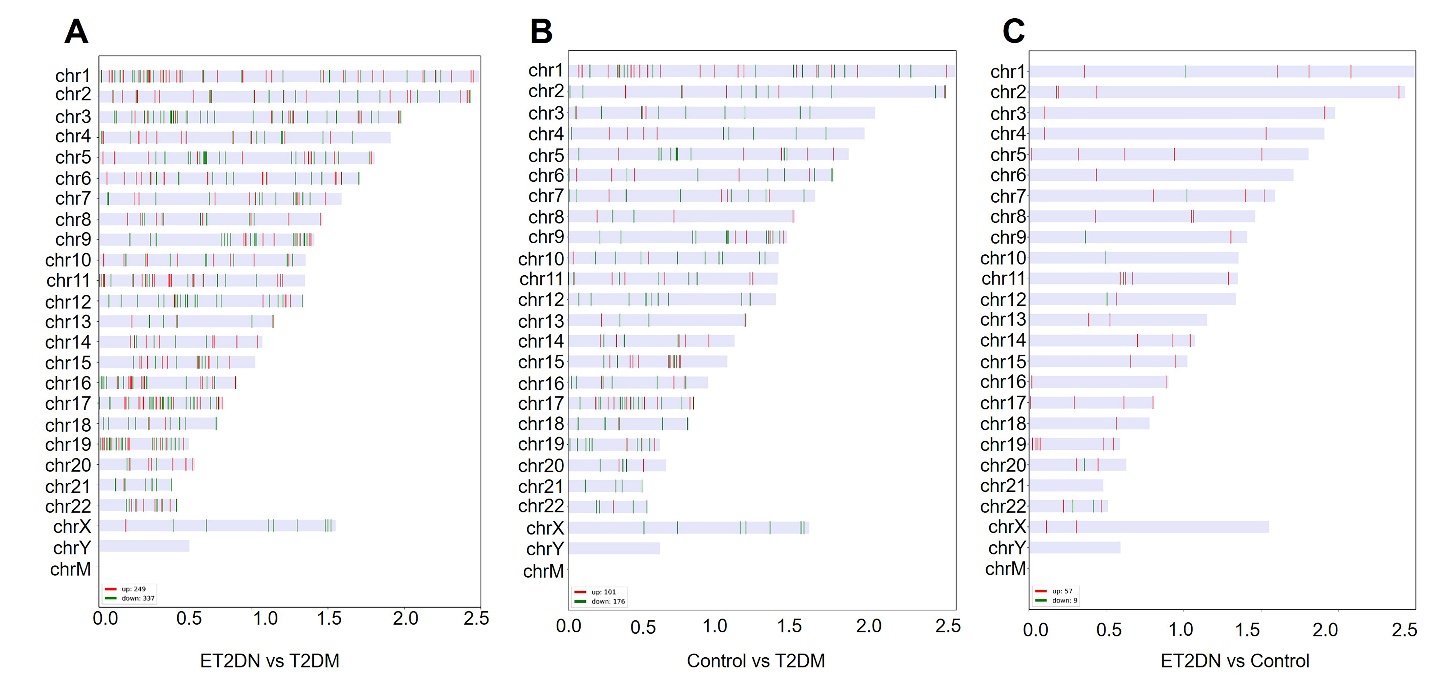


**Supplementary figure 1** The distribution in human chromosomes of DECs. (A) ET2DN vs T2DM group; (B) Control vs T2DM group; (C) ET2DN vs control group.


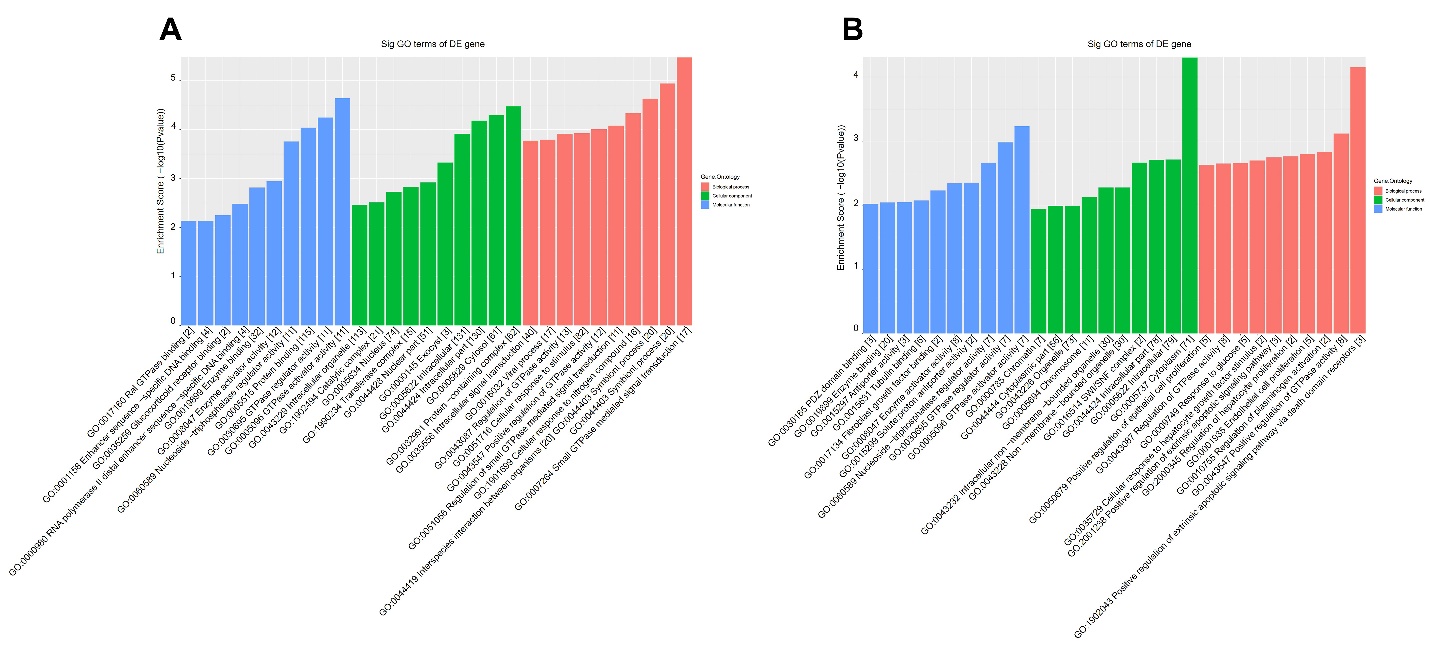


**Supplementary figure 2** GO analysis of DECs for their host genes in T2DM vs control group. GO analysis of upregulated (A) and downregulated (B) DECs in T2DM vs control group.


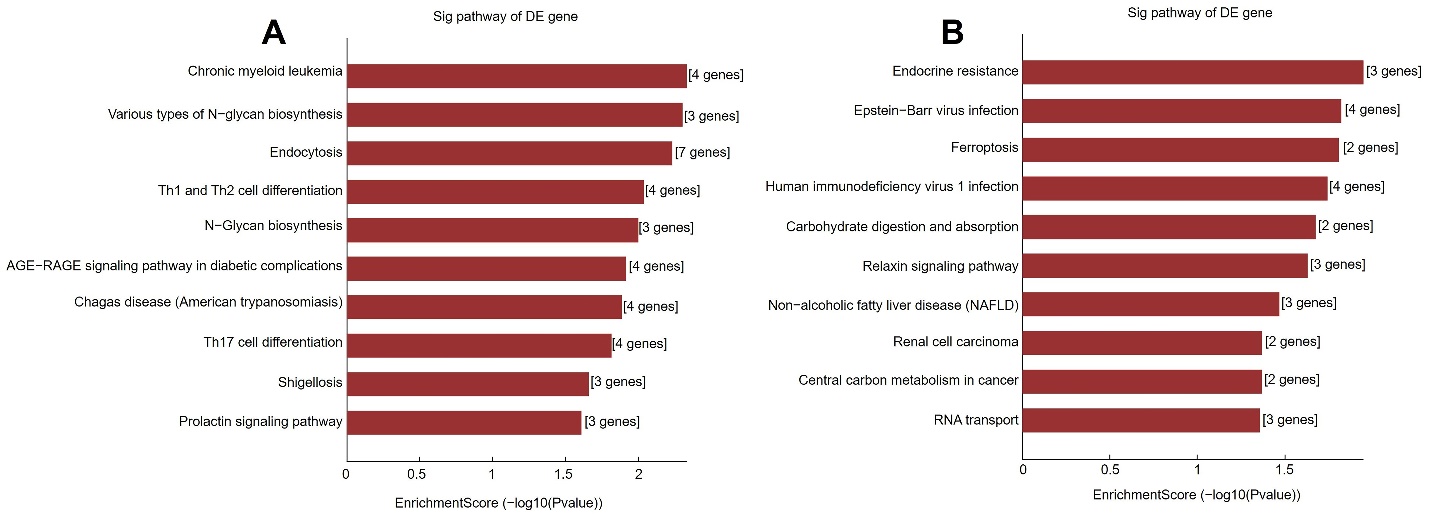


**Supplementary figure 3** Pathway analysis of DECs for their host genes in T2DM vs control group. Pathway analysis of upregulated (A) and downregulated (B) DECs in T2DM vs control group.

| **Supplementary table 1** Primer sequences used for qRT-PCR | |
| --- | --- |
| circRNA | Primer sequence (5’-3’) |
| hsa_circ_0001831 | 5’- CCTGTGTTCCACACCACACAC-3’ |
| 5’- CTAAAGGTAGACCAGAATCGGCT-3’ |
| hsa_circ_0044235 | 5’- GCAGAAAAGCCATGATGATATTGT-3’ |
| 5’- CCTTTCCTGAGCGGTAATAACA-3’ |
| hsa_circ_0061260 | 5’- AAACAATCGGGAGAAGATAGCAA-3’ |
| 5’- GCTGTATCCAGGCACATTCCAT-3’ |
| hsa_circ_0000658 | 5’-GTGGTATTTTGTTATAGTCGCCTGA -3’ |
| 5’- GTTCACCGACTGGAAGGGCT-3’ |
| hsa_circ_0063503 | 5’-GACATGAGACCAACGAAAACTGC-3’ |
| 5’- GGCTGGCGTCATTTTCAAAG -3’ |
| hsa_circ_0000867 | 5’- AGGGGAGAGGCTTCTGGTCGA-3’ |
| 5’- CCTCCGAAGCCGAGTCCCAT-3’ |

| **Supplementary table 2** Upregulated of circRNAs in T2DM vs control group | | | | | |
| --- | --- | --- | --- | --- | --- |
| **circRNA** | **P-value** | **FDR** | **FC** | **Best  transcript** | **Gene  Symbol** |
| hsa_circ_0044235 | 0.032357596 | 0.526539281 | 4.4313975 | NM_001114091 | CDC27 |
| hsa_circ_0061251 | 0.01999 | 0.526539281 | 4.377259 | NM_182482 | BAGE2 |
| hsa_circ_0070739 | 0.039279843 | 0.526539281 | 3.981572 | TCONS_000 08208 | TCONS_000 08208 |
| hsa_circ_0048148 | 0.037599 | 0.526539281 | 3.6544073 | NM_004368 | CNN2 |
| hsa_circ_0086490 | 0.015811052 | 0.526539281 | 3.4920225 | NM_004529 | MLLT3 |
| hsa_circ_0002145 | 0.007594378 | 0.526539281 | 3.4261515 | NM_203458 | NOTCH2NL |
| hsa_circ_0039557 | 0.015060774 | 0.526539281 | 3.4246704 | NM_133368 | RSPRY1 |
| hsa_circ_0004097 | 0.031098301 | 0.526539281 | 3.414459 | NM_031912 | SYT15 |
| hsa_circ_0008223 | 0.031751196 | 0.526539281 | 3.4022939 | NM_015171 | XPO6 |
| hsa_circ_0000858 | 0.026250781 | 0.526539281 | 3.3598811 | None | None |

Abbreviations: FDR, false discovery rate; FC, fold change.

| **Supplementary table 3** Downregulated of circRNAs in T2DM vs control group | | | | | |
| --- | --- | --- | --- | --- | --- |
| **circRNA** | **P-value** | **FDR** | **FC** | **Best  transcript** | **Gene  Symbol** |
| hsa_circ_0001831 | 0.037868861 | 0.526539281 | 20.5788141 | NM_015356 | SCRIB |
| hsa_circ_0008389 | 0.003750463 | 0.526539281 | 8.1200459 | NM_018198 | DNAJC11 |
| hsa_circ_0000520 | 0.020232377 | 0.526539281 | 5.7184052 | NR_002312 | RPPH1 |
| hsa_circ_0011377 | 0.00672601 | 0.526539281 | 5.0355047 | NM_003757 | EIF3I |
| hsa_circ_0001305 | 0.013919219 | 0.526539281 | 4.6557042 | NM_005778 | RBM5 |
| hsa_circ_0000102 | 0.005640712 | 0.526539281 | 4.332589 | NM_001048210 | CLCC1 |
| hsa_circ_0000315 | 0.016811664 | 0.526539281 | 4.0763913 | NM_020238 | INCENP |
| hsa_circ_0000598 | 0.033844897 | 0.526539281 | 4.0266429 | NM_004048 | B2M |
| hsa_circ_0006359 | 0.0258325 | 0.526539281 | 3.9875218 | NM_015266 | SLC9A8 |
| hsa_circ_0005336 | 0.013817364 | 0.526539281 | 3.7280729 | NM_015626 | WSB1 |

**Abbreviations:** FDR, false discovery rate; FC, fold change.

| **Supplementary table 4** Upregulated of circRNAs in ET2DN vs control group | | | | | |
| --- | --- | --- | --- | --- | --- |
| **circRNA** | **P-value** | **FDR** | **FC** | **Best  transcript** | **Gene  Symbol** |
| hsa_circ_0000658 | 0.02387408 | 0.995440049 | 4.1967592 | NM_001159643 | MCTP2 |
| hsa_circ_0074598 | 0.006016201 | 0.995440049 | 2.22982 | NM_001155 | ANXA6 |
| hsa_circ_0000867 | 0.040246611 | 0.995440049 | 2.005455 | NM_004152 | OAZ1 |
| hsa_circ_0007919 | 0.002663876 | 0.995440049 | 1.9564087 | NM_001159746 | ABR |
| hsa_circ_0007794 | 0.003008632 | 0.995440049 | 1.935202 | TCONS_000 03590 | TCONS_000 03590 |
| hsa_circ_0073379 | 0.02754718 | 0.995440049 | 1.8960691 | NM_024717 | MCTP1 |
| hsa_circ_0022430 | 0.028385534 | 0.995440049 | 1.7946911 | NM_001620 | AHNAK |
| hsa_circ_0000144 | 0.049033517 | 0.995440049 | 1.7942853 | NM_052931 | SLAMF6 |
| hsa_circ_0063812 | 0.032403214 | 0.995440049 | 1.780357 | NM_014246 | CELSR1 |
| hsa_circ_0003423 | 0.013506717 | 0.995440049 | 1.7585713 | NM_018181 | ZNF532 |

**Abbreviations:** FDR, false discovery rate; FC, fold change.

| **Supplementary table 5** Downregulated of circRNAs in ET2DN vs control group | | | | | |
| --- | --- | --- | --- | --- | --- |
| **circRNA** | **P-value** | **FDR** | **FC** | **Best  transcript** | **Gene  Symbol** |
| hsa_circ_0063503 | 0.010802848 | 0.995440049 | 1.6606151 | NM_031488 | L3MBTL2 |
| hsa_circ_0022249 | 0.013011662 | 0.995440049 | 1.6314168 | NM_152718 | VWCE |
| hsa_circ_0062688 | 0.049670399 | 0.995440049 | 1.6188951 | NM_012399 | PITPNB |
| hsa_circ_0009035 | 0.006205066 | 0.995440049 | 1.551232 | NM_001126103 | RACGAP1 |
| hsa_circ_0002968 | 0.030414707 | 0.995440049 | 1.5403324 | NM_002750 | MAPK8 |

**Abbreviations:** FDR, false discovery rate; FC, fold change.
